# Supplementary material for: Changing minds about climate change in Indonesia through a TV drama
Source: Frontiers journal article supplement (doi:10.3389/fcomm.2024.1366289), 2024-08-07
Supplement: Data_Sheet_1.docx [file Data_Sheet_1.docx]

**Episode 1: Flood, pollution, recycling, food waste**

This episode talked about the flood in Jakarta that forced Bodo to return to his home, and in particular to his mother with her obsession about making her son the village head. The flood and loss that Bodo experienced triggered Bodo to help Tuji (his crush) encourage villagers to stop throwing trash into the river. At the same time, motorbike credit companies have representatives in villages who offer motorbike loans without down payment, which results in severe air pollution. Another source of air pollution is the villagers’ habit of incinerating their garbage. On another occasion, Tuji, Bodo, and their friends held trainings to show others how to process and recycle organic and inorganic waste.

**Episode 2: Fast fashion, save water**

This episode portrays the overuse of water and the trend of fast fashion. Tuji & his friends plan to have a workshop to teach the villagers about how important it is to save water and how much water is wasted each day. Related to their concern about saving water is their recognition that livestock production also contributes to water shortages, which makes the main characters want reduce the amount of meat in their diet. They realize how drastic and extreme the climate has become, in part reflecting the ongoing natural disaster of deforestation.

**Episode 3: Hydroponics, e-waste, forest fire**

The crop failure experienced by farmers due to drought prompted the main characters to teach about hydroponics. This episode illustrates the dangers of electronic waste, which causes cancer and harms the environment. Later in the episode, the story focuses on a developer who wants to buy the green space and transform it into factories. While cutting down the trees, some villagers burn the garbage, and the fire gets bigger until it causes a full-blown forest fire. This episode also showed a bit about city forests, calling attention to the fact that trees are important not only for the forest but for everywhere we live, including in the cities.

**Episode 4: Global warming, factory waste**

Global warming causes forest fires, and forest fires cause global warming. While the factories were still being built, the villagers think about and discuss their likely effects, including factory waste and deforestation. They conclude that factory waste is a horrible side-effect; it could destroy the water and land, then make the air dangerous for humans. The last scene depicts very heavy rain and flooding in the village, attesting to the negative consequences of deforestation.
