# Supplementary material for: Changing minds about climate change in Indonesia through a TV drama
Source: Frontiers journal article supplement (doi:10.3389/fcomm.2024.1366289), 2024-08-07
Supplement: Table_1.DOCX [file Table_1.DOCX]

Supplementary Materials for Changing minds about climate change in Indonesia through a TV drama

Links to treatment and placebo TV episodes:

- <https://www.vidio.com/premier/781/samudra-cinta> (TV drama)
- <https://www.youtube.com/watch?v=ycHEHoM8RR0>
